# Supplementary material for: Diet quality in older age: the influence of childhood and adult socio-economic circumstances
Source: PubMed Central journal article supplement (PMC4462157; doi:10.1017/s0007114515000604), 2015-04-01
Supplement: S0007114515000604sup001.pdf [file S0007114515000604sup001.pdf]

**Supplementary Table 1.** Elderly Dietary Index scoring criteria

| <b>Elderly Dietary Index Scoring</b> |                                   |                                                                          |                                  |                                              |                                                                                                  |
|--------------------------------------|-----------------------------------|--------------------------------------------------------------------------|----------------------------------|----------------------------------------------|--------------------------------------------------------------------------------------------------|
| <b>Component</b>                     | <b>Score = 1</b>                  | <b>Score = 2</b>                                                         | <b>Score = 3</b>                 | <b>Score = 4</b>                             | <b>Number of line items from the Food Frequency Questionnaire used to compute each component</b> |
| Meat                                 | ≥3 days/week                      | Never/rarely                                                             | <1 day/week                      | 1-2 days/week                                | 9                                                                                                |
| Fish/Seafood                         | Never/rarely                      | <1 day/week                                                              | ≥3 days/week                     | 1-2 days/week                                | 3                                                                                                |
| Legumes                              | Never/rarely                      | <1 day/week                                                              | ≥3 days/week                     | 1-2 days/week                                | 1                                                                                                |
| Fruit                                | <1 day/week                       | 1-2 days/week                                                            | 3-6 days/week                    | Daily                                        | 2                                                                                                |
| Vegetables                           | <1 day/week                       | 1-2 days/week                                                            | 3-6 days/week                    | Daily                                        | 2                                                                                                |
| Cereals                              | <1 day/week                       | 1-2 days/week                                                            | 3-6 days/week                    | Daily                                        | 8                                                                                                |
| Bread                                | None                              | White                                                                    | White and whole grain            | Whole grain                                  | 3                                                                                                |
| Olive oil <sup>a</sup>               | Never/Rarely                      | Tertile 1 of intake                                                      | Tertile 2 of intake              | Tertile 3 of intake                          | 1                                                                                                |
| Dairy                                | Full-fat milk and full-fat cheese | Semi-skimmed milk and full-fat cheese / full-fat milk and low-fat cheese | Skimmed milk and full-fat cheese | Skimmed/Semi-skimmed milk and low-fat cheese | 3                                                                                                |

<sup>a</sup>The frequency of olive oil consumption was not available so the scoring of this component was modified from the original score used (1 = <1 day/week; 2 = 1-2 days/week; 3 = 3-6 days/week; 4 = daily) to the quantity of weekly consumption (never/rarely consumed and tertiles of weekly consumption).
